# Supplementary material for: The role of morphology in the spatial distribution of short-duration rainfall extremes in Italy
Source: Copernicus journal article supplement (doi:10.5194/hess-26-1659-2022), 2022-03-30
Supplement: Supplementary file 1 [file hess-26-1659-2022-supplement.zip]

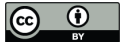

## *Supplement of*

# **The role of morphology in the spatial distribution of short-duration rainfall extremes in Italy**

**Paola Mazzoglio et al.**

*Correspondence to:* Paola Mazzoglio ([paola.mazzoglio@polito.it](mailto:paola.mazzoglio@polito.it))

- `hess-26-1659-2022-supplement-title-page.pdf`
- `supplement_mazzoglio`
  - `GC4_model`
    - \* `GC4_model.dbf`
    - \* `GC4_model.prj`
    - \* `GC4_model.qpj`
    - \* `GC4_model.shp`
    - \* `GC4_model.shx`
  - `paper_HESS_2022_Mazzoglio_supplement.pdf`

The copyright of individual parts of the supplement might differ from the article licence.
