# Supplementary material for: The role of morphology in the spatial distribution of short-duration rainfall extremes in Italy
Source: Copernicus journal article supplement (doi:10.5194/hess-26-1659-2022), 2022-03-30
Supplement: Supplementary file 2 [file hess-26-1659-2022-supplement.zip]

Archive with 9 entries (7 files):
- hess-26-1659-2022-supplement-title-page.pdf
- supplement_mazzoglio/
- supplement_mazzoglio/GC4_model/
- supplement_mazzoglio/GC4_model/GC4_model.prj
- supplement_mazzoglio/GC4_model/GC4_model.dbf
- supplement_mazzoglio/GC4_model/GC4_model.qpj
- supplement_mazzoglio/GC4_model/GC4_model.shp
- supplement_mazzoglio/GC4_model/GC4_model.shx
- supplement_mazzoglio/paper_HESS_2022_Mazzoglio_supplement.pdf
