# Supplementary material for: The role of morphology in the spatial distribution of short-duration rainfall extremes in Italy
Source: Copernicus journal article supplement (doi:10.5194/hess-26-1659-2022), 2022-03-30
Supplement: Supplementary file 2 [file hess-26-1659-2022-supplement.zip › supplement_mazzoglio/GC4_model/GC4_model.prj]

PROJCS["WGS_1984_UTM_Zone_32N",GEOGCS["GCS_WGS_1984",DATUM["D_WGS_1984",SPHEROID["WGS_1984",6378137,298.257223563]],PRIMEM["Greenwich",0],UNIT["Degree",0.017453292519943295]],PROJECTION["Transverse_Mercator"],PARAMETER["latitude_of_origin",0],PARAMETER["central_meridian",9],PARAMETER["scale_factor",0.9996],PARAMETER["false_easting",500000],PARAMETER["false_northing",0],UNIT["Meter",1]]
